# Supplementary material for: Granulins Regulate Aging Kinetics in the Adult Zebrafish Telencephalon
Source: MDPI journal article supplement (doi:10.3390/cells9020350), 2020-02-03

### Notch signalling pathway

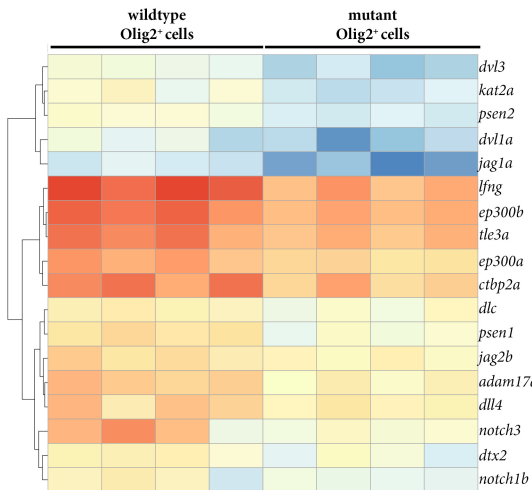

### Hedgehog signalling pathway

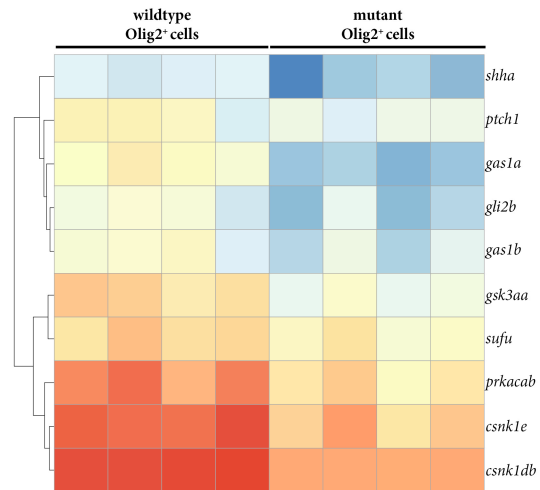

### ErbB signalling pathway

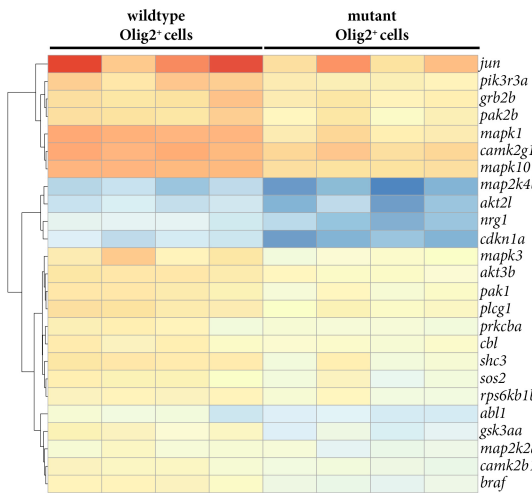

### Negative regulation of BMP signalling pathway

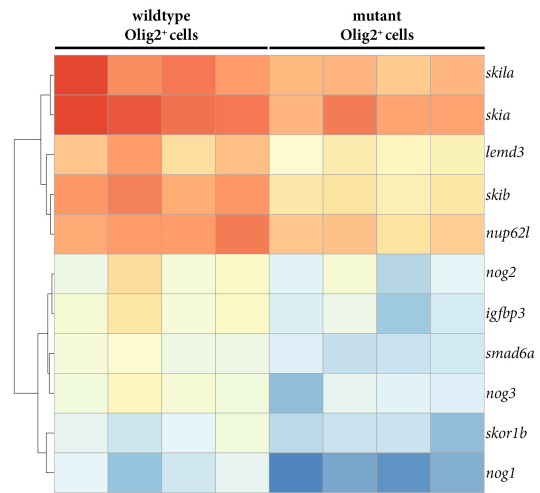

### TGF-beta signalling pathway

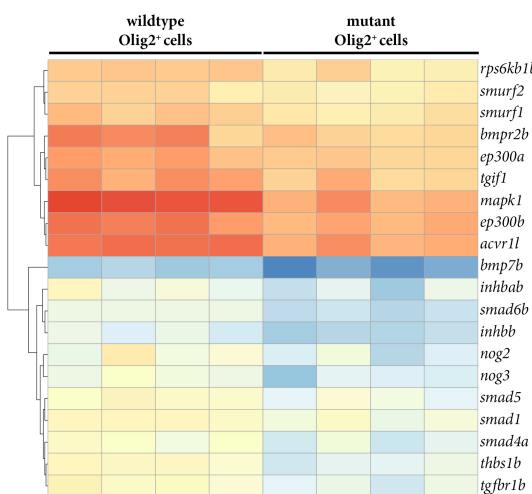

Supplement: s1 [file s1]
