# Supplementary figures and images for: Granulins Regulate Aging Kinetics in the Adult Zebrafish Telencephalon
Source: MDPI journal article supplement (doi:10.3390/cells9020350), 2020-02-03

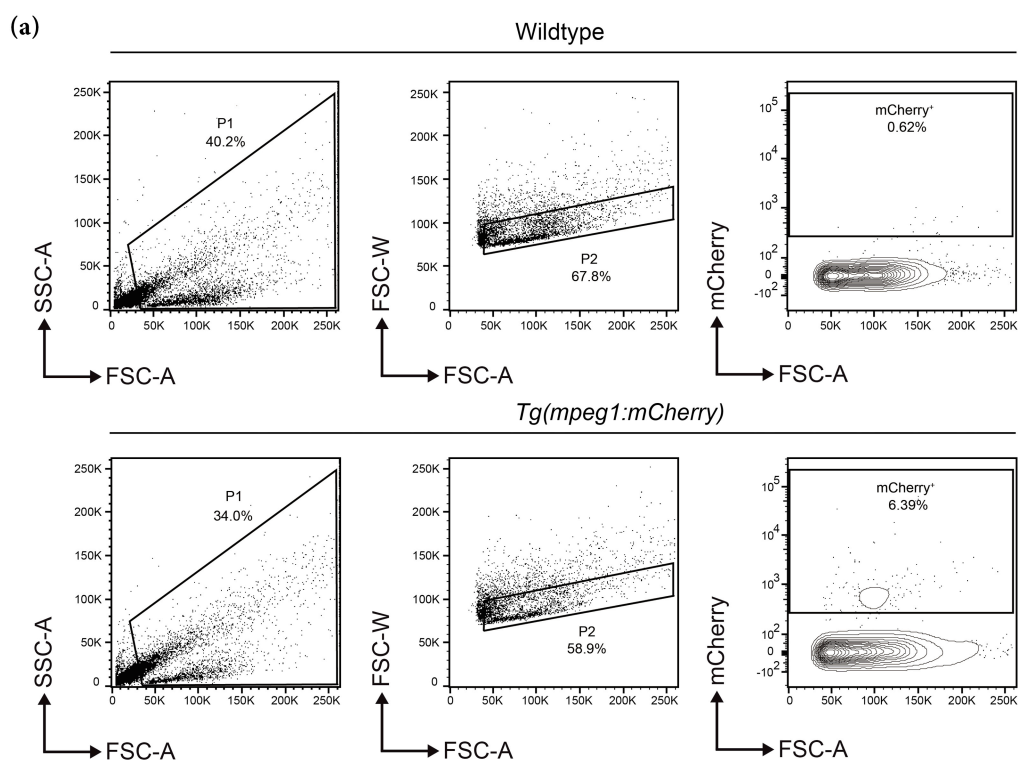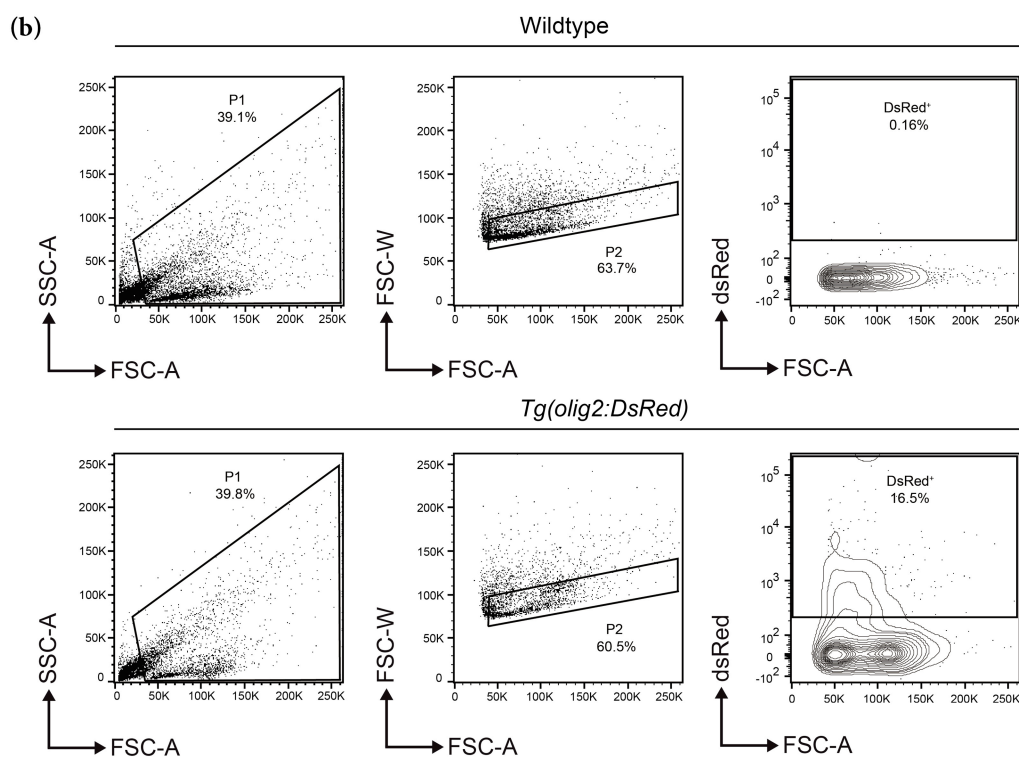

Supplement: s1 [file s1]

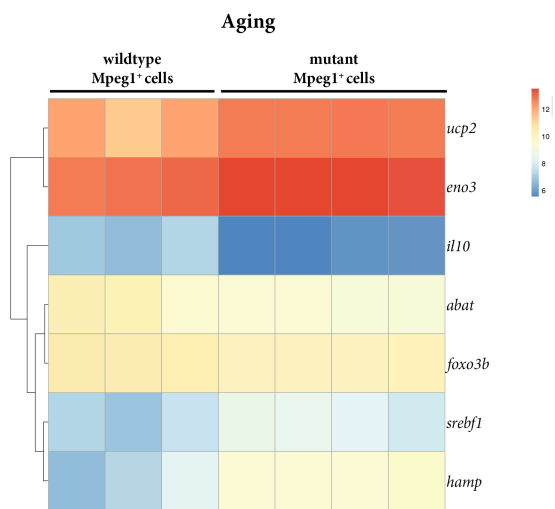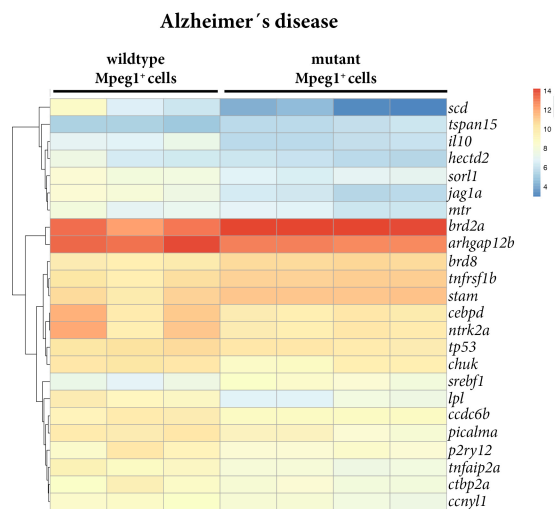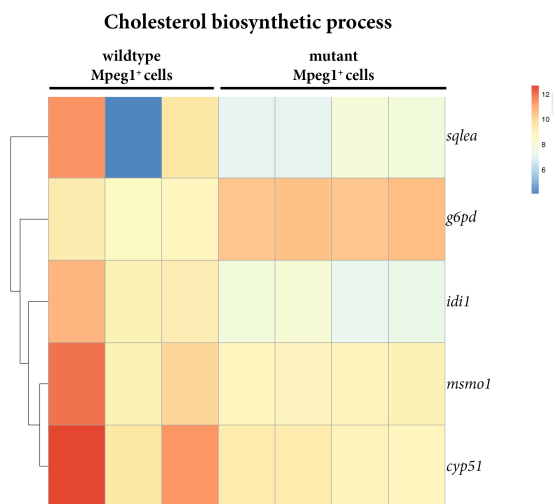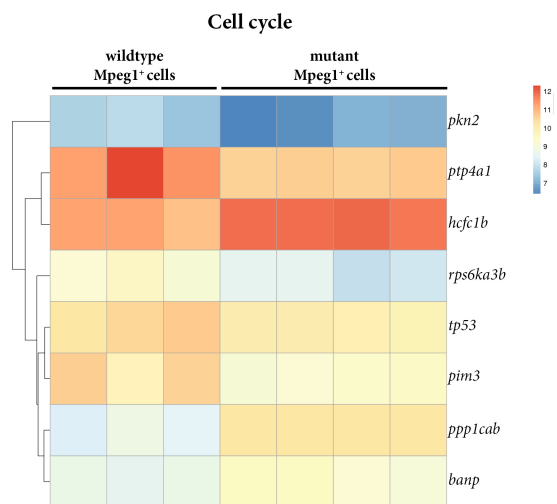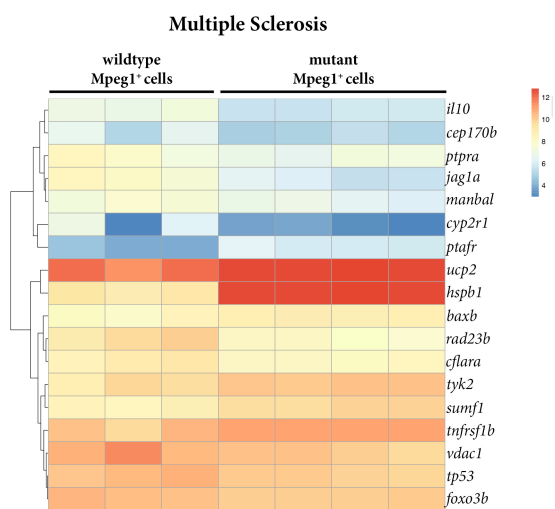

Supplement: s1 [file s1]

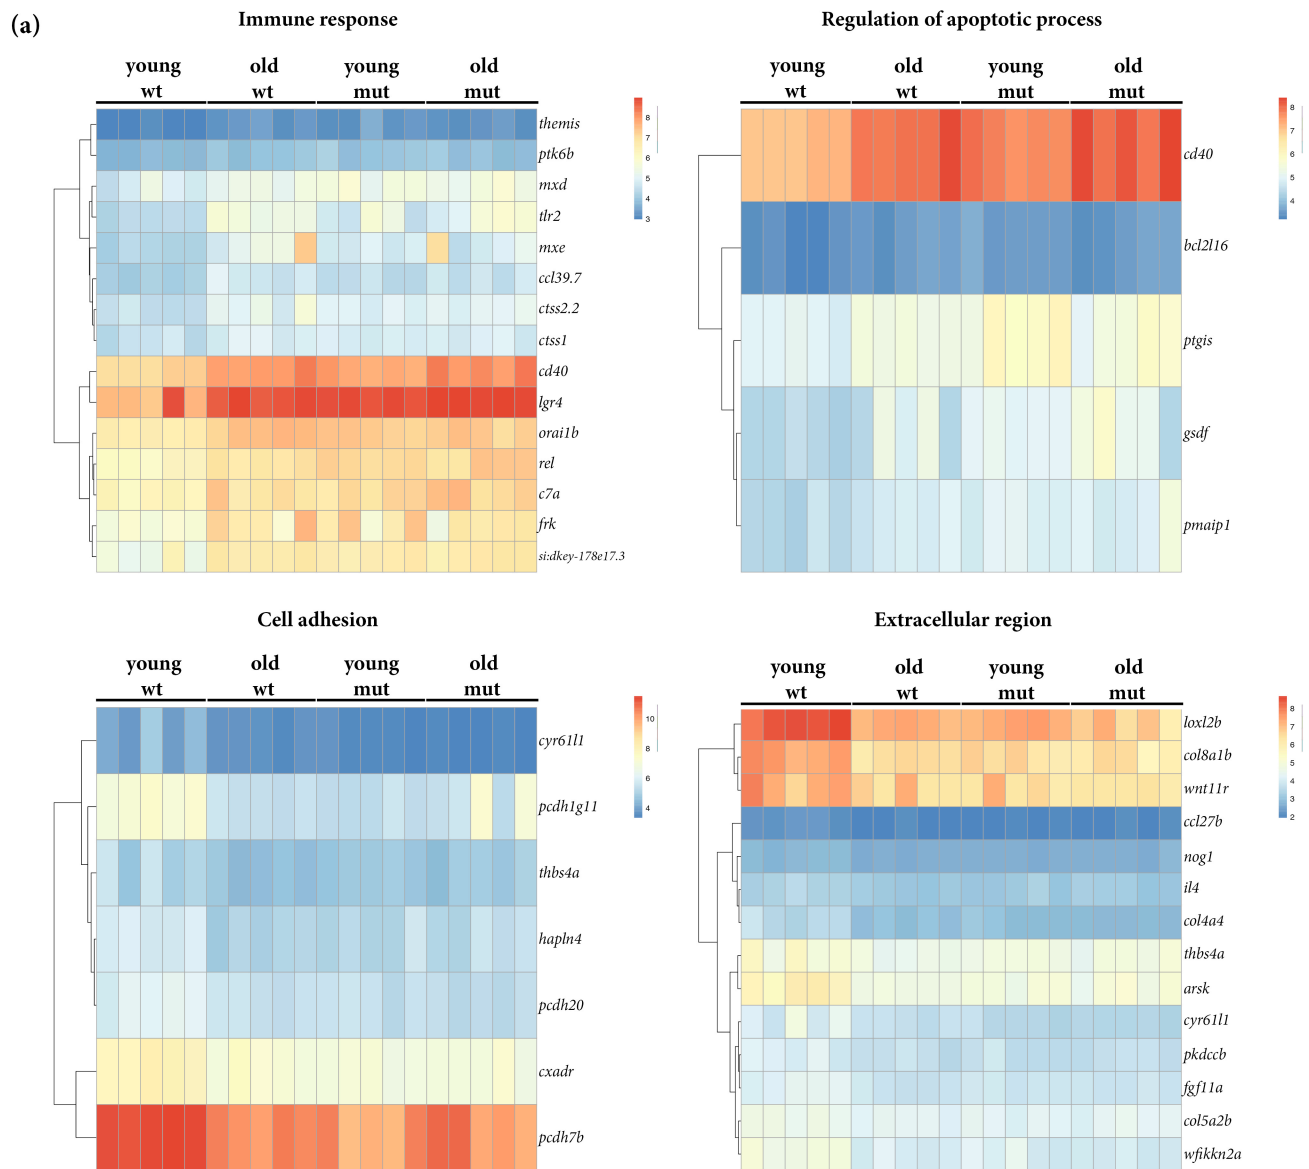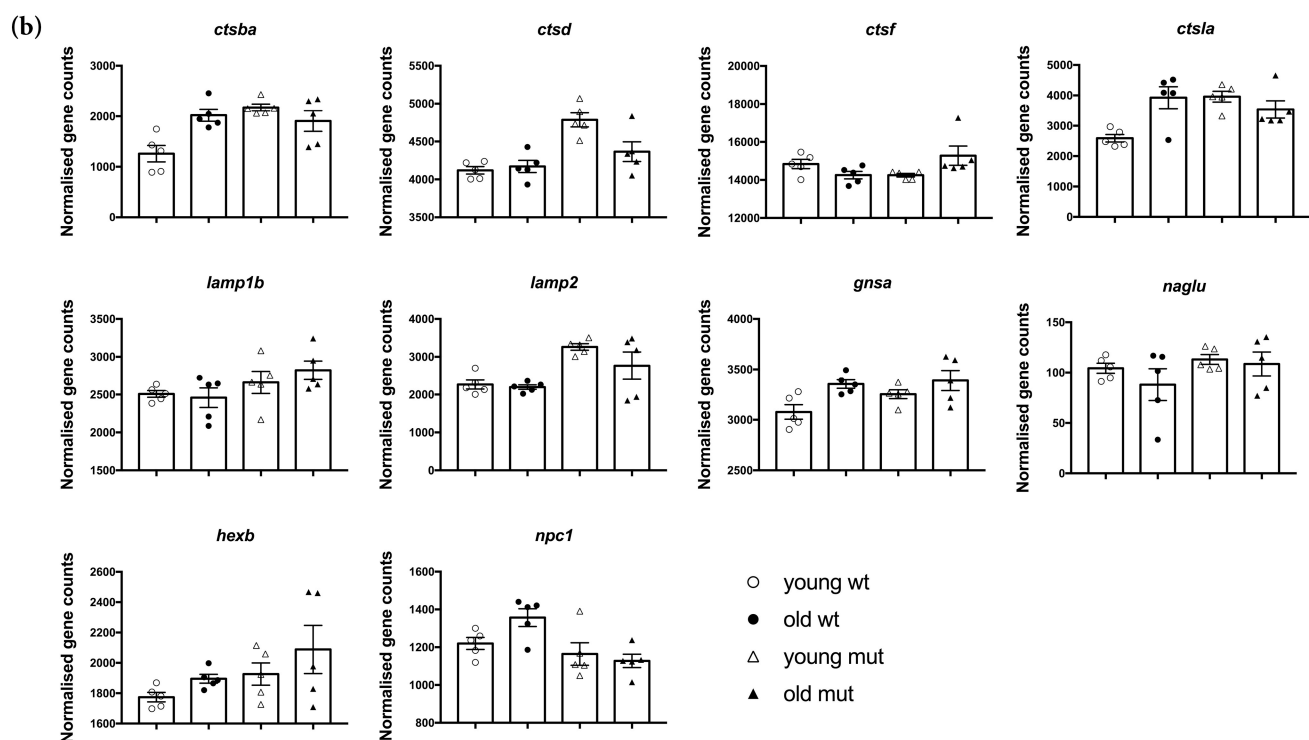

Supplement: s1 [file s1]

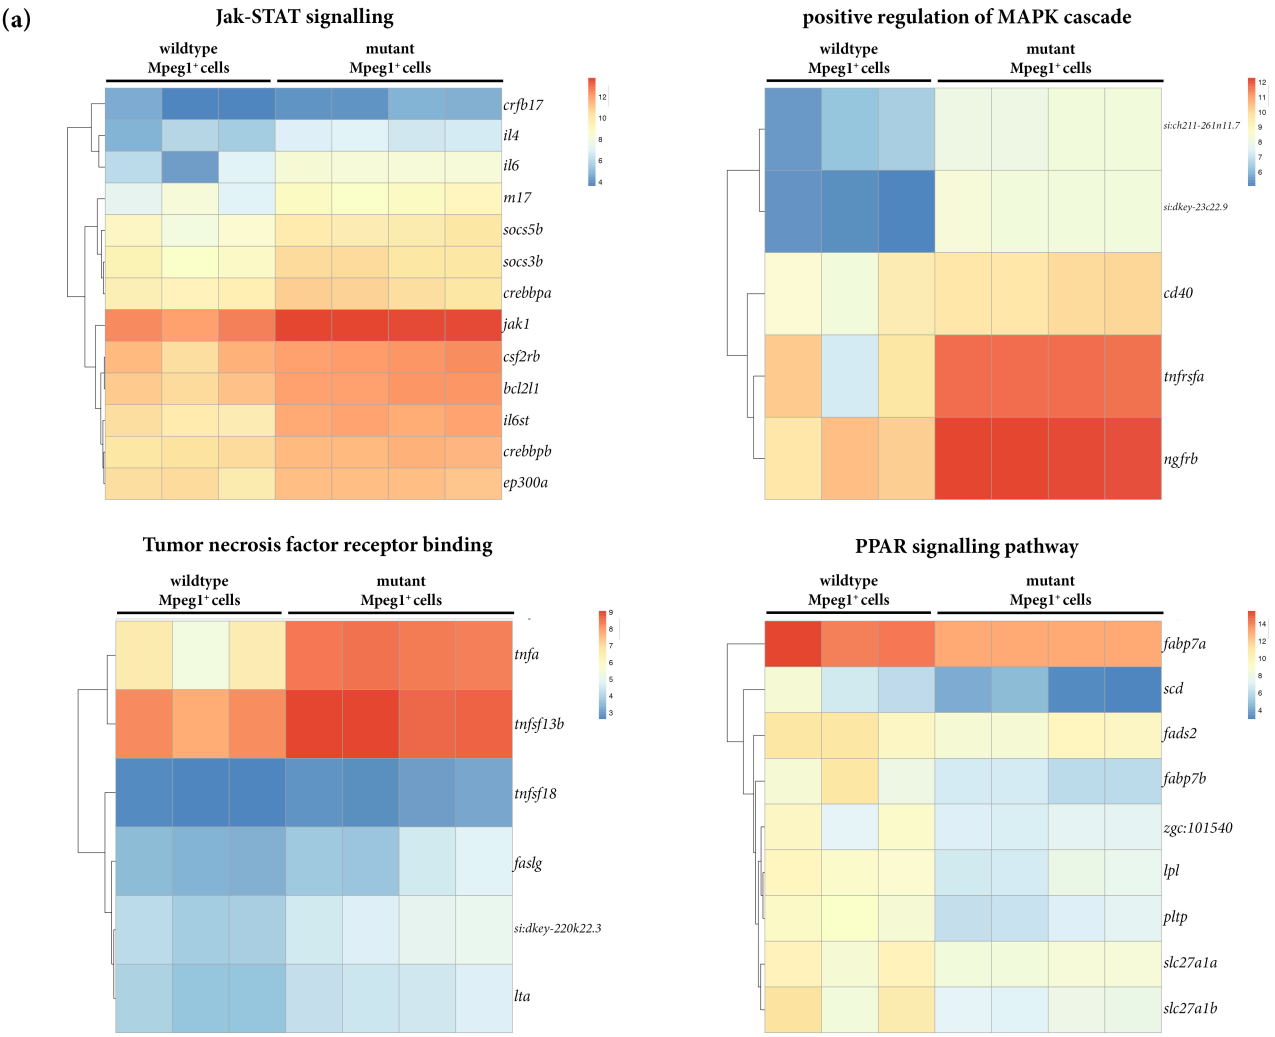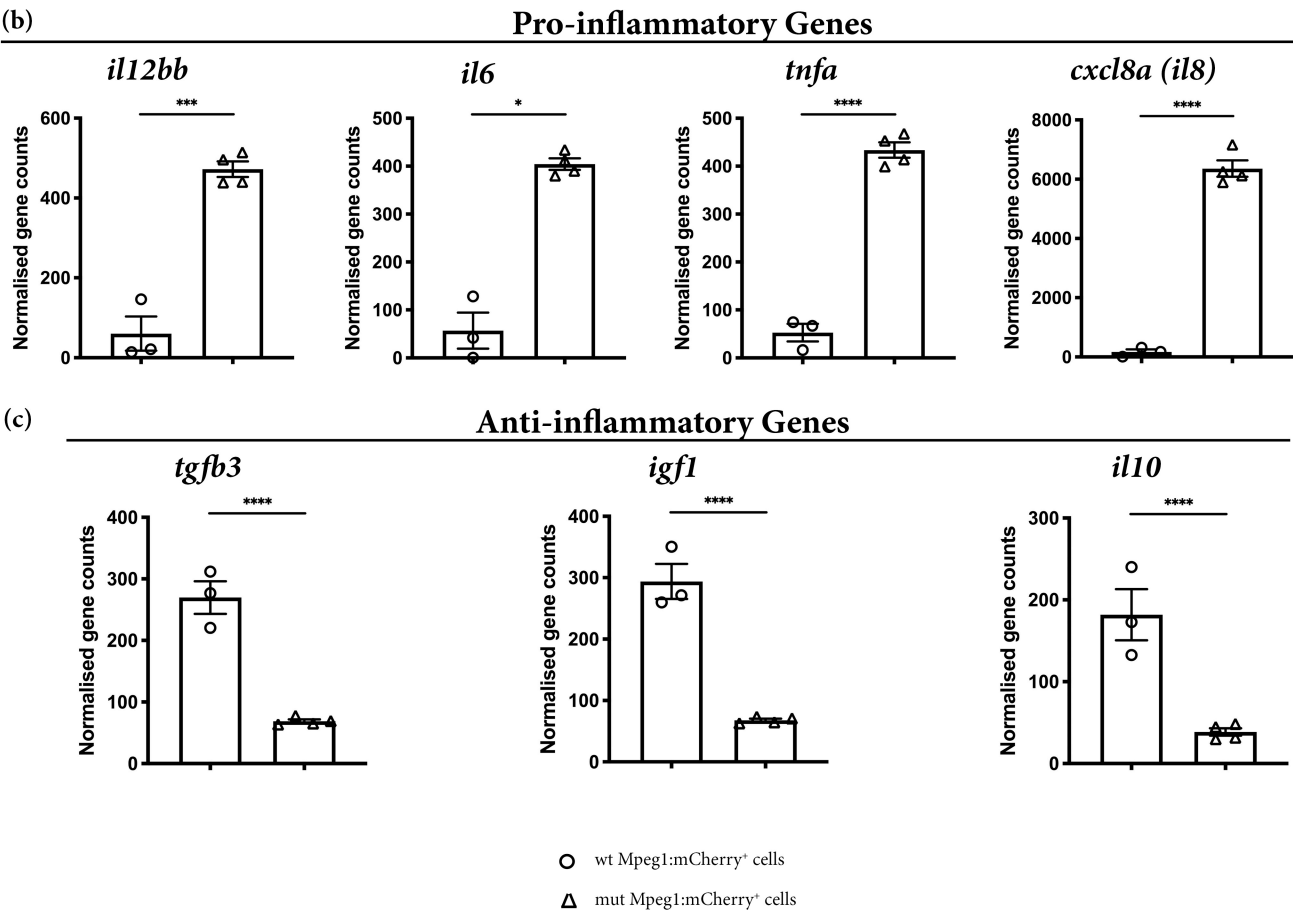

Supplement: s1 [file s1]

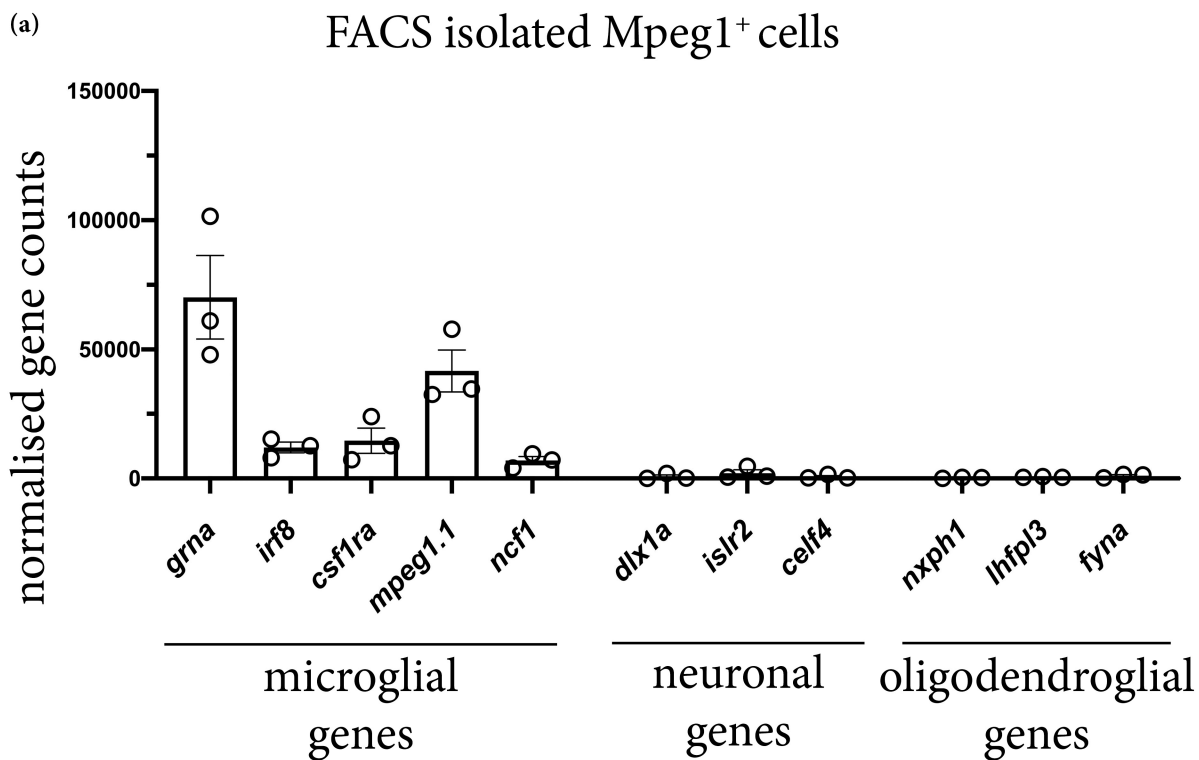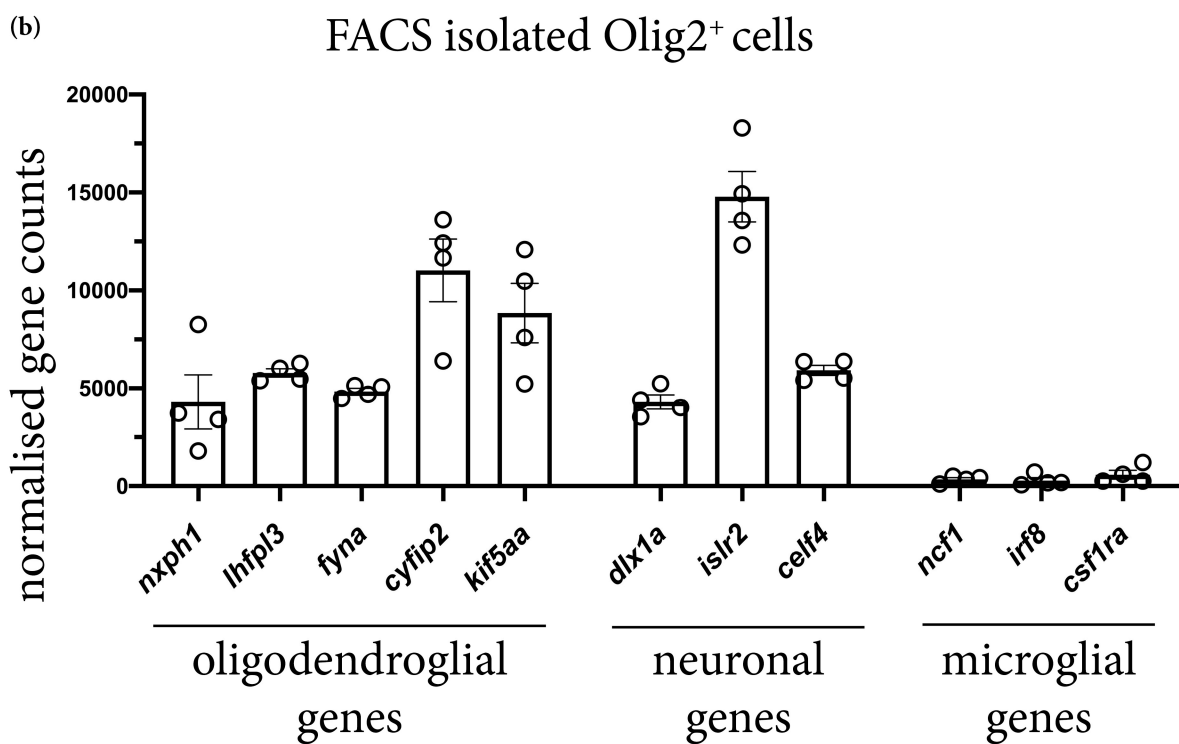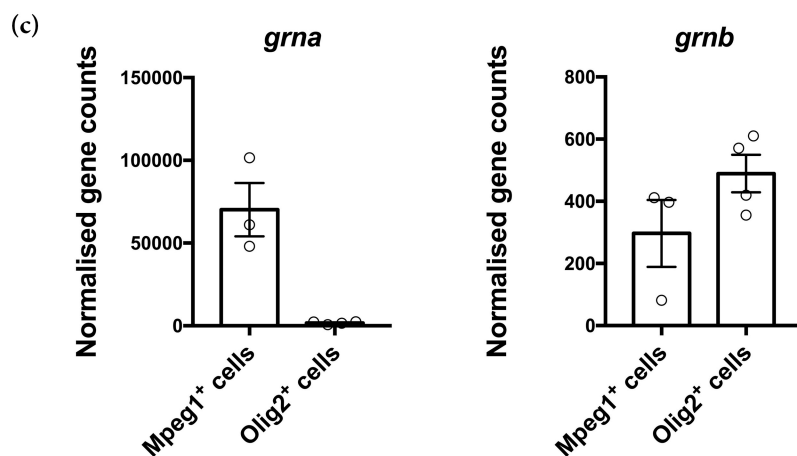

Supplement: s1 [file s1]
